# Supplementary material for: BODIPY-based fluorescent probe for the simultaneous detection of glutathione and cysteine/homocysteine at different excitation wavelengths
Source: Royal Society of Chemistry journal article supplement (doi:10.1039/c4ra13526a), 2014-12-05

*Supplementary Information*

**BODIPY-based fluorescent probe for the simultaneous detection of glutathione and cysteine/homocysteine at different excitation wavelengths**

Li-Ya Niu,<sup>a</sup> Qing-Qing Yang,<sup>a,c</sup> Hai-Rong Zheng,<sup>a,c</sup> Yu-Zhe Chen,<sup>a</sup> Li-Zhu Wu,<sup>a</sup> Chen-Ho Tung<sup>a</sup> and Qing-Zheng Yang<sup>\*a,b</sup>

<sup>a</sup> Key Laboratory of Photochemical Conversion and Optoelectronic Materials, Technical Institute of Physics and Chemistry, Chinese Academy of Sciences, Beijing, 100190, P. R. China

<sup>b</sup> College of Chemistry, Beijing Normal University, Beijing, 100875, P. R. China

<sup>c</sup> University of Chinese Academy of Sciences, Beijing, 100049, P. R. China

## Synthesis of Compound C1

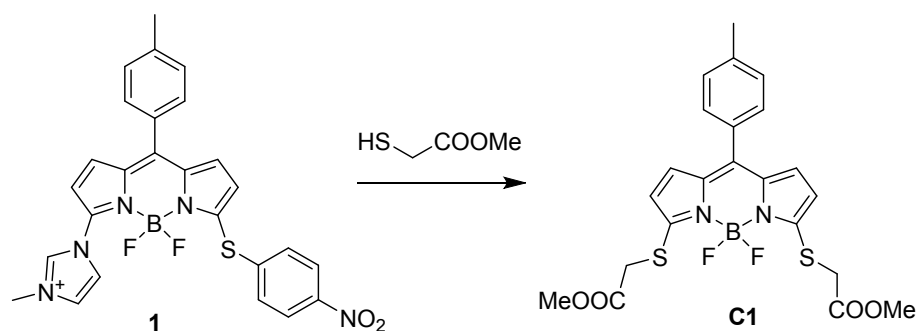

Compound **1** (36 mg, 0.07 mmol) was dissolved in 20 mL acetonitrile and one drop of triethylamine and mercaptopropionic acid (25  $\mu$ L, 0.28 mmol) was added. The mixture was stirred at r.t for 10 min and then evaporated. The residue was purified by column chromatography on silica gel (dichloromethane / petroleum ether = 1/1 as eluent) to give **C1** (28 mg, 83%) as a purple solid. <sup>1</sup>H NMR (400 MHz, CDCl<sub>3</sub>):  $\delta$  7.38 (d, 2H,  $J$  = 8.0 Hz), 7.30 (d, 2H,  $J$  = 8.0 Hz), 6.80 (d, 1H,  $J$  = 4.0 Hz), 6.51 (d, 1H,  $J$  = 4.4 Hz), 3.81 (s, 4H), 3.77 (s, 6H), 2.45 (s, 3H).

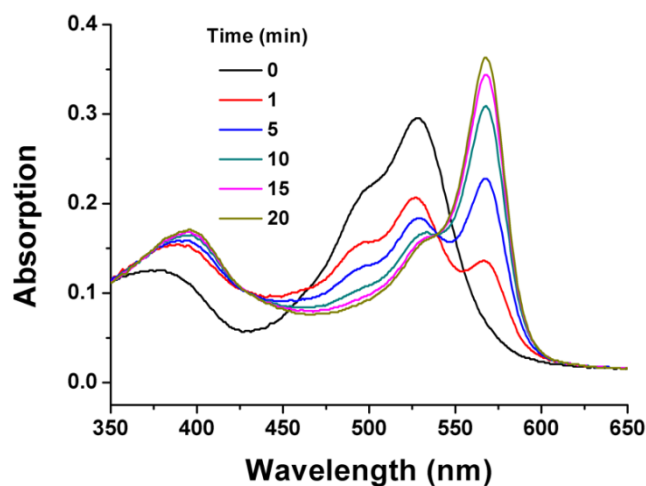

**Fig. S1** Time-dependent absorption spectra of **1** (10  $\mu$ M) in addition of GSH (1 mM) in acetonitrile/ HEPES buffer (1:99, v/v, 20 mM, pH 7.4).

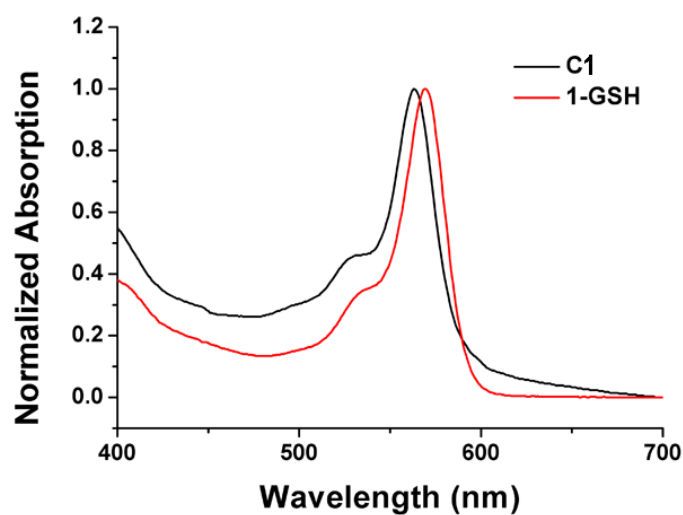

**Fig. S2** Normalized absorption spectra of C1 and 1-GSH.

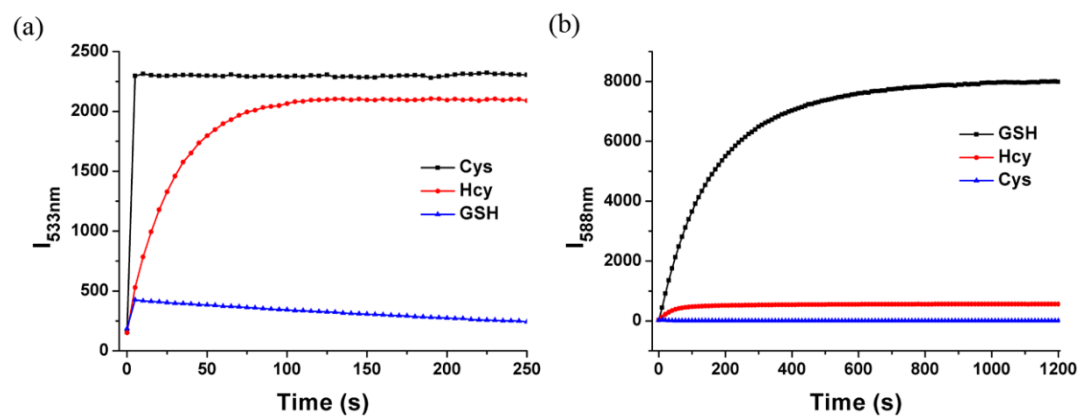

**Fig. S3** Time-dependent emission intensity changes in addition of Cys, Hcy and GSH at (a) 533 nm ( $\lambda_{\text{ex}} = 443$  nm), (b) 588 nm ( $\lambda_{\text{ex}} = 568$  nm) in acetonitrile/ HEPES buffer (1:99, v/v, 20 mM, pH 7.4).

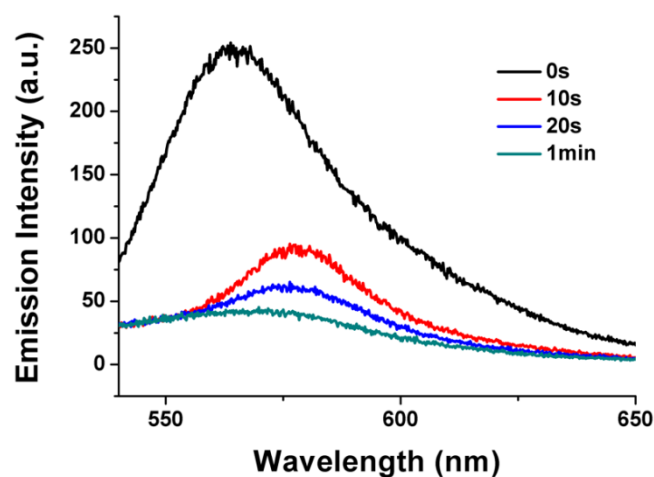

**Fig. S4** Time-dependent fluorescence spectra of **1** (10  $\mu\text{M}$ ) with addition of (a) GSH (1 mM) and (b) Hcy (1 mM) in acetonitrile/ HEPES buffer (1:99, v/v, 20 mM, pH 7.4).  $\lambda_{\text{ex}} = 528 \text{ nm}$ .

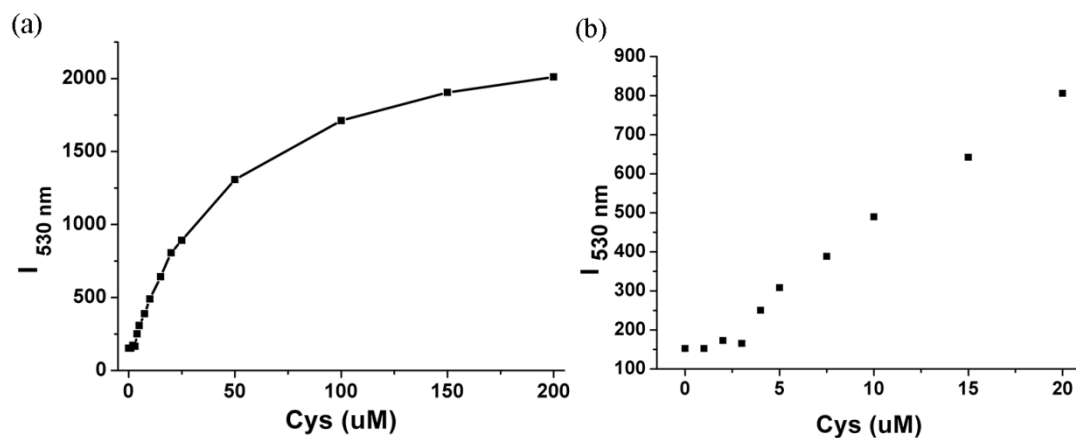

**Fig. S5** Plot of the fluorescence intensity as a function of Cys concentrations. Each data was acquired 1 min after Cys addition in acetonitrile/ HEPES buffer (1:99, v/v, 20 mM, pH 7.4).  $\lambda_{\text{ex}} = 443 \text{ nm}$ .

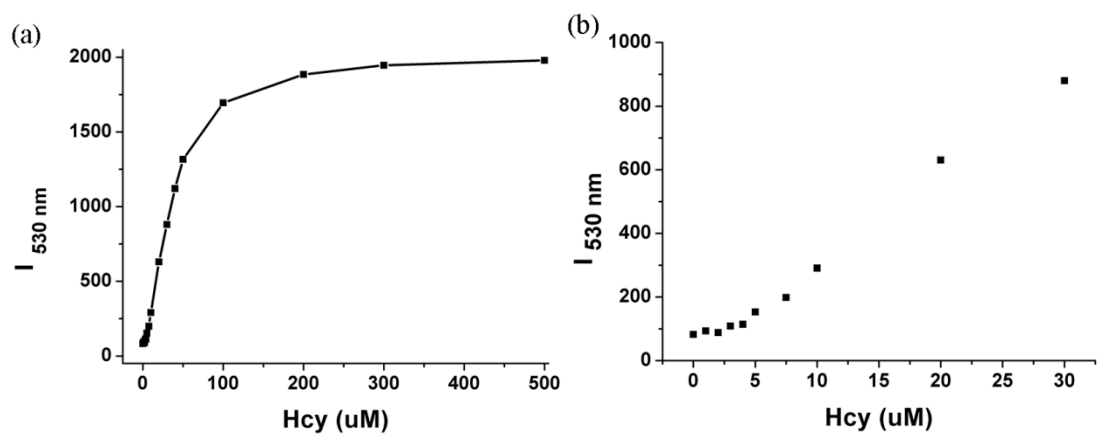

**Fig. S6** Plot of the fluorescence intensity as a function of Hcy concentrations. Each data was acquired 5 min after Cys addition in acetonitrile/ HEPES buffer (1:99, v/v, 20 mM, pH 7.4).  $\lambda_{\text{ex}} = 443 \text{ nm}$ .

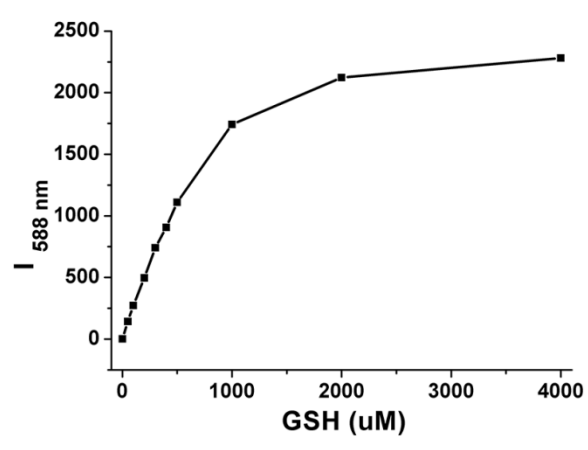

**Fig. S7** Plot of the fluorescence intensity as a function of GSH concentrations. Each data was acquired 5 min after Cys addition in acetonitrile/ HEPES buffer (1:99, v/v, 20 mM, pH 7.4).  $\lambda_{\text{ex}} = 568 \text{ nm}$ .

# <sup>1</sup>H NMR, <sup>13</sup>C NMR and HRMS of 1

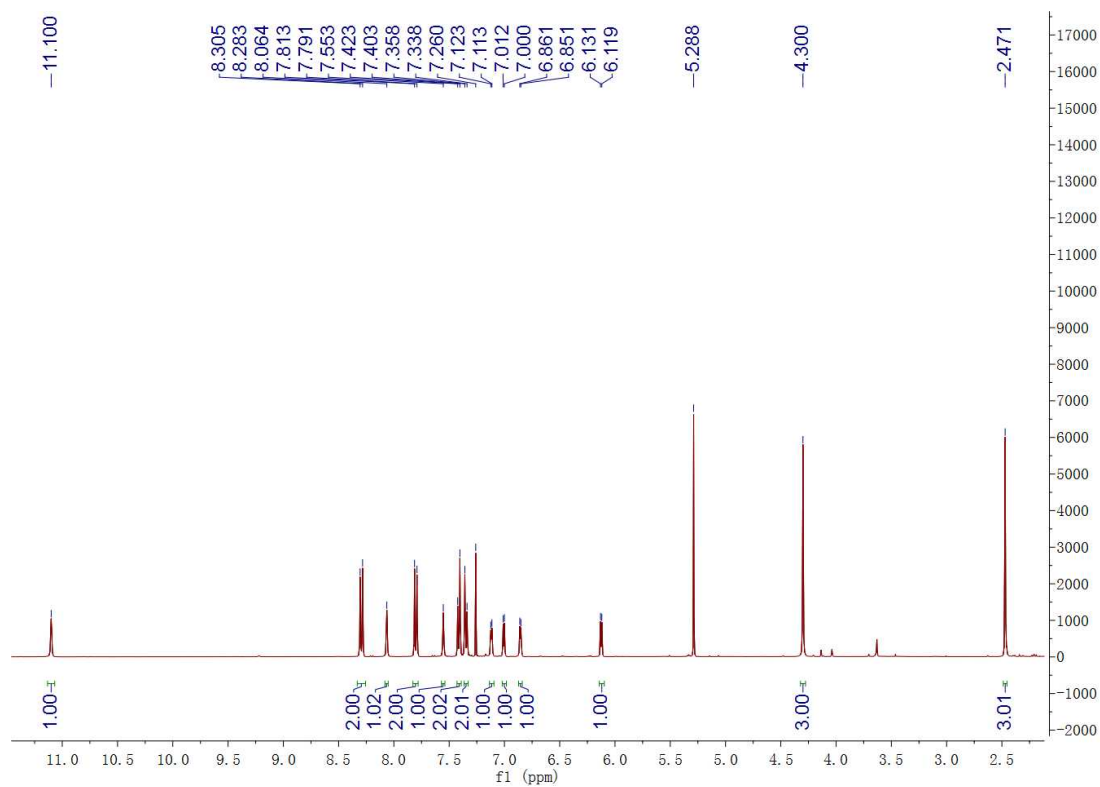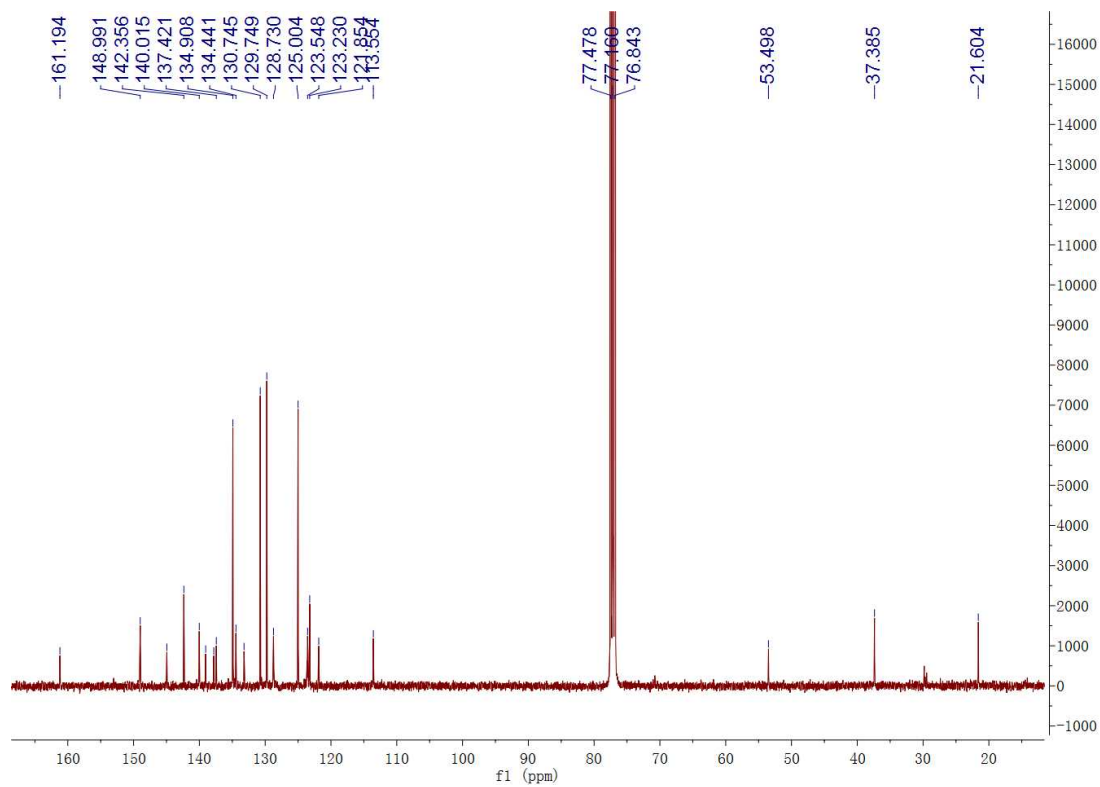

# Peking University Mass Spectrometry Sample Analysis Report

## Analysis Info

Analysis Name 14070254\_20140723\_000001.d  
Sample NLY  
Comment ESI Positive

Acquisition Date 7/23/2014 3:06:08 PM  
Instrument Bruker Apex IV FTMS  
Operator Peking University

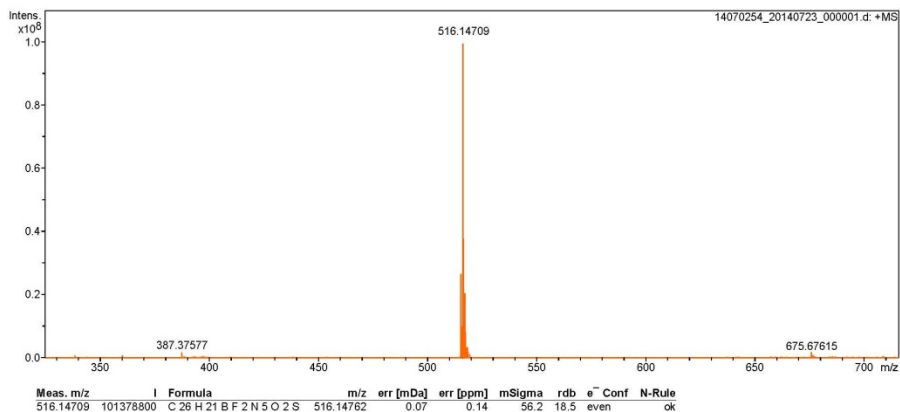

Supplement: c4ra13526a1.pdf [file c4ra13526a1.pdf]
